# Supplementary material
Source: bioRxiv or medRxiv preprint supplement (https://www.biorxiv.org/highwire/filestream/118112/field_highwire_adjunct_files/3/389197-4.pdf)
Supplement: Supplementary file [file 389197-4.pdf]

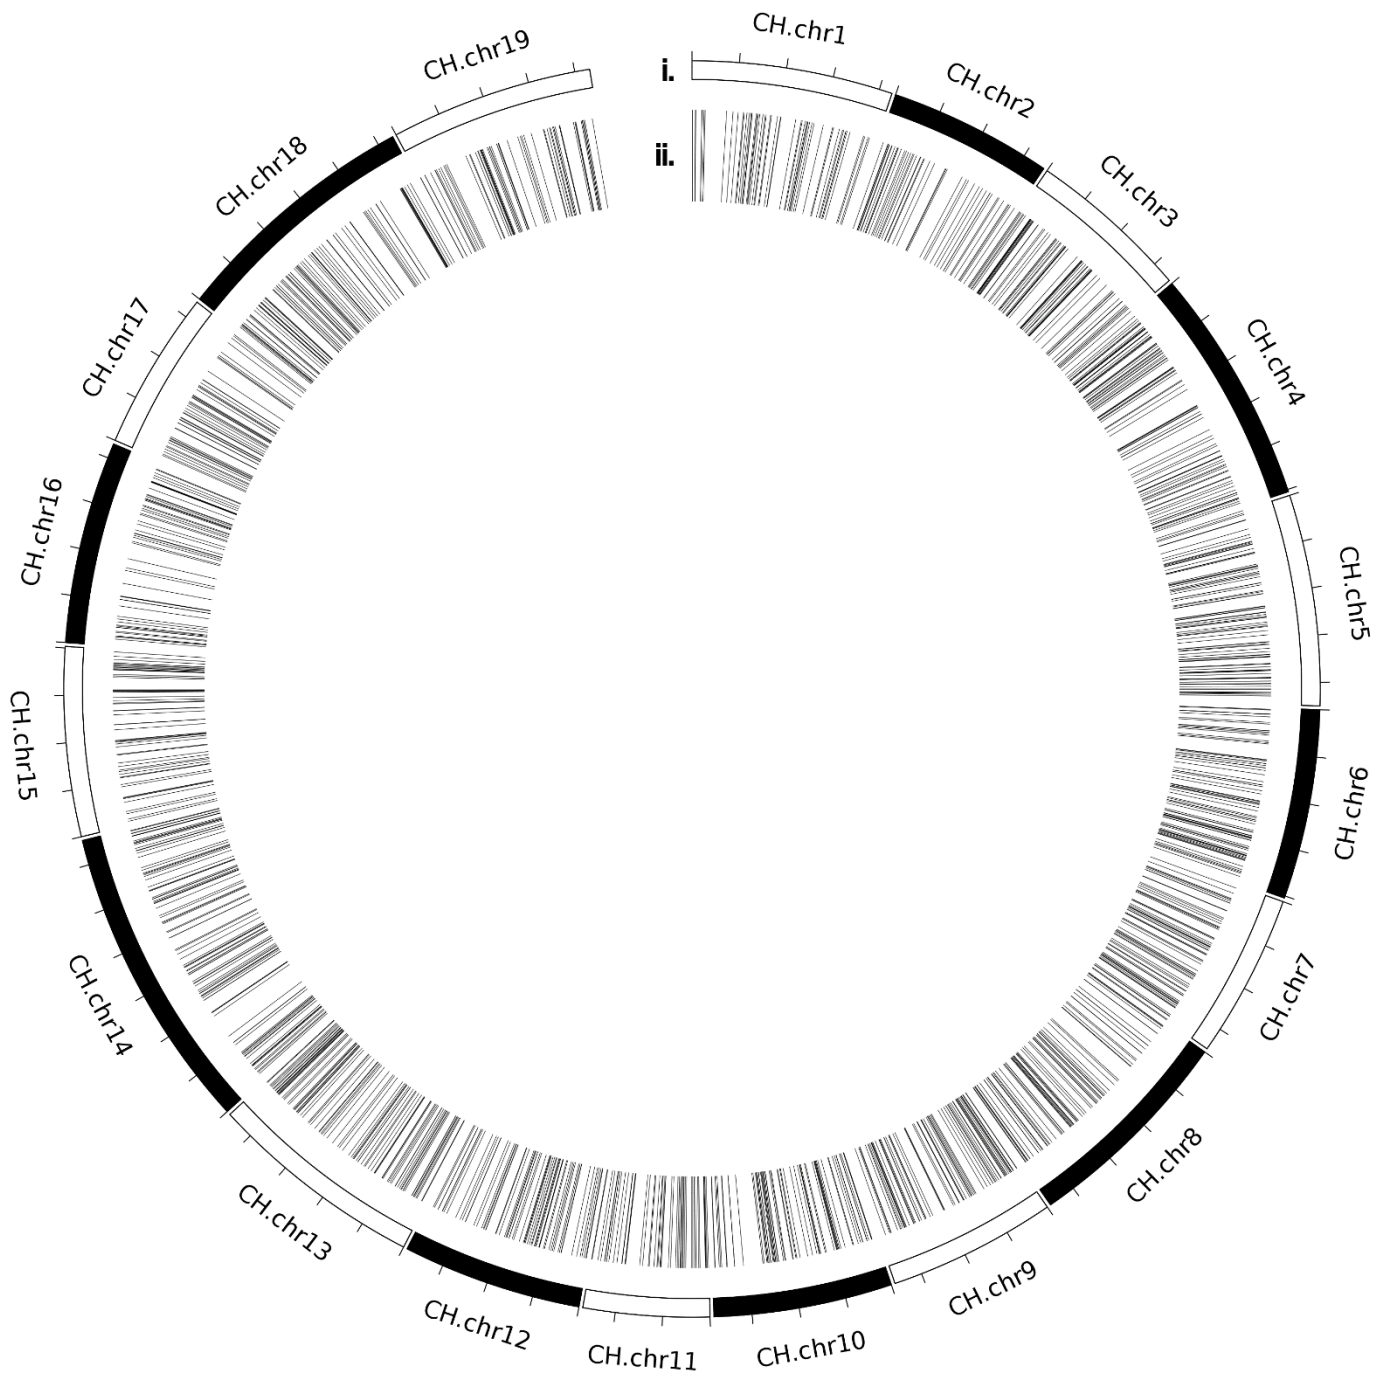

**S4 Figure: Distribution of clonal markers over the Chardonnay assembly.** Chardonnay chromosome-ordered primary contigs (i) and clonal marker variants (ii).
